# Supplementary material for: Assessment of the genomic variation in a cattle population by re-sequencing of key animals at low to medium coverage
Source: PubMed Central journal article supplement (PMC3716689; doi:10.1186/1471-2164-14-446), 2013-07-04
Supplement: 1471-2164-14-446-S3.pdf [file 1471-2164-14-446-S3.pdf]

| Animal id | Total reads | Duplicates <sup>a</sup> | Mapped reads <sup>b</sup> | Net mapped (%) <sup>c</sup> | Net bases <sup>d</sup> | Net average coverage <sup>e</sup> |
|-----------|-------------|-------------------------|---------------------------|-----------------------------|------------------------|-----------------------------------|
| 55069     | 163482913   | 5.17%                   | 96.43%                    | 149489938 (91.44%)          | 15.10GB                | 5.68                              |
| 55070     | 248209072   | 6.50%                   | 97.90%                    | 227199055 (91.54%)          | 22.72GB                | 8.54                              |
| 55071     | 275347611   | 6.38%                   | 98.04%                    | 252713383 (91.78%)          | 25.27GB                | 9.50                              |
| 55072     | 218095293   | 5.92%                   | 97.72%                    | 200490494 (91.93%)          | 20.05GB                | 7.54                              |
| 55073     | 173087784   | 5.26%                   | 96.37%                    | 158034806 (91.30%)          | 15.96GB                | 6.00                              |
| 55074     | 156705901   | 5.86%                   | 96.28%                    | 142031377 (90.64%)          | 14.35GB                | 5.39                              |
| 55075     | 257059233   | 7.06%                   | 97.79%                    | 233629804 (90.89%)          | 23.36GB                | 8.78                              |
| 55076     | 295394459   | 4.65%                   | 97.04%                    | 273327445 (92.53%)          | 27.24GB                | 10.24                             |
| 55077     | 251461184   | 5.40%                   | 96.89%                    | 230495110 (91.66%)          | 23.05GB                | 8.67                              |
| 55078     | 284445379   | 5.65%                   | 96.90%                    | 260051305 (91.42%)          | 25.98GB                | 9.77                              |
| 55687     | 162759413   | 7.00%                   | 96.14%                    | 145527098 (89.41%)          | 14.70GB                | 5.53                              |
| 55689     | 287537748   | 7.35%                   | 97.72%                    | 260332777 (90.54%)          | 25.87GB                | 9.73                              |
| 55690     | 160290585   | 4.83%                   | 98.05%                    | 149570539 (93.31%)          | 14.66GB                | 5.51                              |
| 55691     | 123602395   | 6.43%                   | 95.93%                    | 110944671 (89.76%)          | 11.09GB                | 4.17                              |
| 55692     | 138843685   | 6.86%                   | 95.81%                    | 123887746 (89.23%)          | 12.39GB                | 4.66                              |
| 55693     | 131466898   | 7.41%                   | 96.80%                    | 117828683 (89.63%)          | 11.78GB                | 4.43                              |
| 55694     | 150863976   | 5.59%                   | 97.29%                    | 138578560 (91.86%)          | 13.86GB                | 5.21                              |
| 55695     | 261211185   | 8.41%                   | 96.46%                    | 230777234 (88.35%)          | 23.22GB                | 8.73                              |
| 55696     | 174223713   | 8.02%                   | 97.64%                    | 156464263 (89.81%)          | 15.74GB                | 5.92                              |
| 55697     | 245108260   | 8.48%                   | 97.18%                    | 217996621 (88.94%)          | 21.80GB                | 8.20                              |
| 55698     | 270847013   | 8.83%                   | 95.63%                    | 236135825 (87.18%)          | 23.61GB                | 8.88                              |
| 56503     | 181507121   | 4.61%                   | 97.99%                    | 169656055 (93.47%)          | 16.97GB                | 6.38                              |
| 56504     | 160842497   | 4.16%                   | 97.84%                    | 150815249 (93.77%)          | 15.08GB                | 5.67                              |
| 56505     | 227151631   | 4.29%                   | 98.35%                    | 213806924 (94.13%)          | 21.38GB                | 8.04                              |
| 56506     | 190028977   | 4.09%                   | 98.18%                    | 178943367 (94.17%)          | 17.89GB                | 6.73                              |
| 56507     | 208459066   | 4.91%                   | 98.23%                    | 194715327 (93.41%)          | 19.47GB                | 7.32                              |
| 56508     | 207068014   | 4.59%                   | 98.23%                    | 194066215 (93.72%)          | 19.41GB                | 7.30                              |
| 56509     | 176164262   | 4.71%                   | 97.99%                    | 164482114 (93.37%)          | 16.45GB                | 6.18                              |
| 58941     | 161865174   | 5.16%                   | 96.24%                    | 147729603 (91.27%)          | 14.92GB                | 5.61                              |
| 58943     | 226335891   | 4.35%                   | 95.54%                    | 206832039 (91.38%)          | 20.68GB                | 7.78                              |
| 58944     | 216683526   | 3.59%                   | 96.85%                    | 202333113 (93.38%)          | 20.23GB                | 7.61                              |
| 58945     | 207869816   | 4.05%                   | 96.97%                    | 193404741 (93.04%)          | 19.34GB                | 7.27                              |
| 58946     | 208384577   | 4.45%                   | 97.03%                    | 193209439 (92.72%)          | 19.32GB                | 7.26                              |
| 58947     | 182548630   | 3.72%                   | 97.06%                    | 170592510 (93.45%)          | 17.06GB                | 6.41                              |
| 58948     | 160719456   | 4.32%                   | 97.13%                    | 149353352 (92.93%)          | 14.94GB                | 5.61                              |
| 58949     | 160661919   | 6.47%                   | 96.48%                    | 144980005 (90.24%)          | 14.64GB                | 5.50                              |
| 58950     | 212036734   | 5.66%                   | 96.65%                    | 193340167 (91.18%)          | 19.33GB                | 7.27                              |
| 58951     | 160626127   | 6.89%                   | 96.41%                    | 144198385 (89.77%)          | 14.56GB                | 5.48                              |
| 58952     | 178349820   | 4.57%                   | 96.93%                    | 164966017 (92.50%)          | 16.50GB                | 6.20                              |
| 58953     | 225268008   | 5.15%                   | 97.06%                    | 207389836 (92.06%)          | 20.74GB                | 7.80                              |
| esmeralda | 974913554   | 15.55%                  | 96.92%                    | 797934242 (81.85%)          | 66.44GB                | 24.98                             |
| valero    | 332400410   | 12.79%                  | 90.06%                    | 261080902 (78.54%)          | 26.11GB                | 9.82                              |
| vanstein  | 686227977   | 13.17%                  | 94.87%                    | 565303870 (82.38%)          | 20.35GB                | 7.65                              |

<sup>a</sup> PCR-duplicates arising during the amplification step of the library preparation and marked with MarkDuplicates option of the Picard tools [1]

<sup>b</sup> Proportion of reads that have been mapped successfully to the UMD3.1 assembly [2] with bwa [3]

<sup>c</sup> Number of mapped reads excluding duplicates

<sup>d</sup> Number of net mapped reads multiplied by read lengths (see Additional file 2)

<sup>e</sup> Number of net bases divided by the length of the genome (~2.67 Gb)

## References

1. <http://picard.sourceforge.net>. .
2. Zimin AV, Delcher AL, Florea L, Kelley DR, Schatz MC, Puiu D, Hanrahan F, Pertea G, Van Tassell CP, Sonstegard TS, Marçais G, Roberts M, Subramanian P, Yorke JA, Salzberg SL: **A whole-genome assembly of the domestic cow, *Bos taurus***. *Genome Biol* 2009, **10**:R42.
3. Li H, Durbin R: **Fast and accurate short read alignment with Burrows–Wheeler transform**. *Bioinformatics* 2009, **25**:1754–1760.
