# Supplementary material for: Assessment of the genomic variation in a cattle population by re-sequencing of key animals at low to medium coverage
Source: PubMed Central journal article supplement (PMC3716689; doi:10.1186/1471-2164-14-446), 2013-07-04

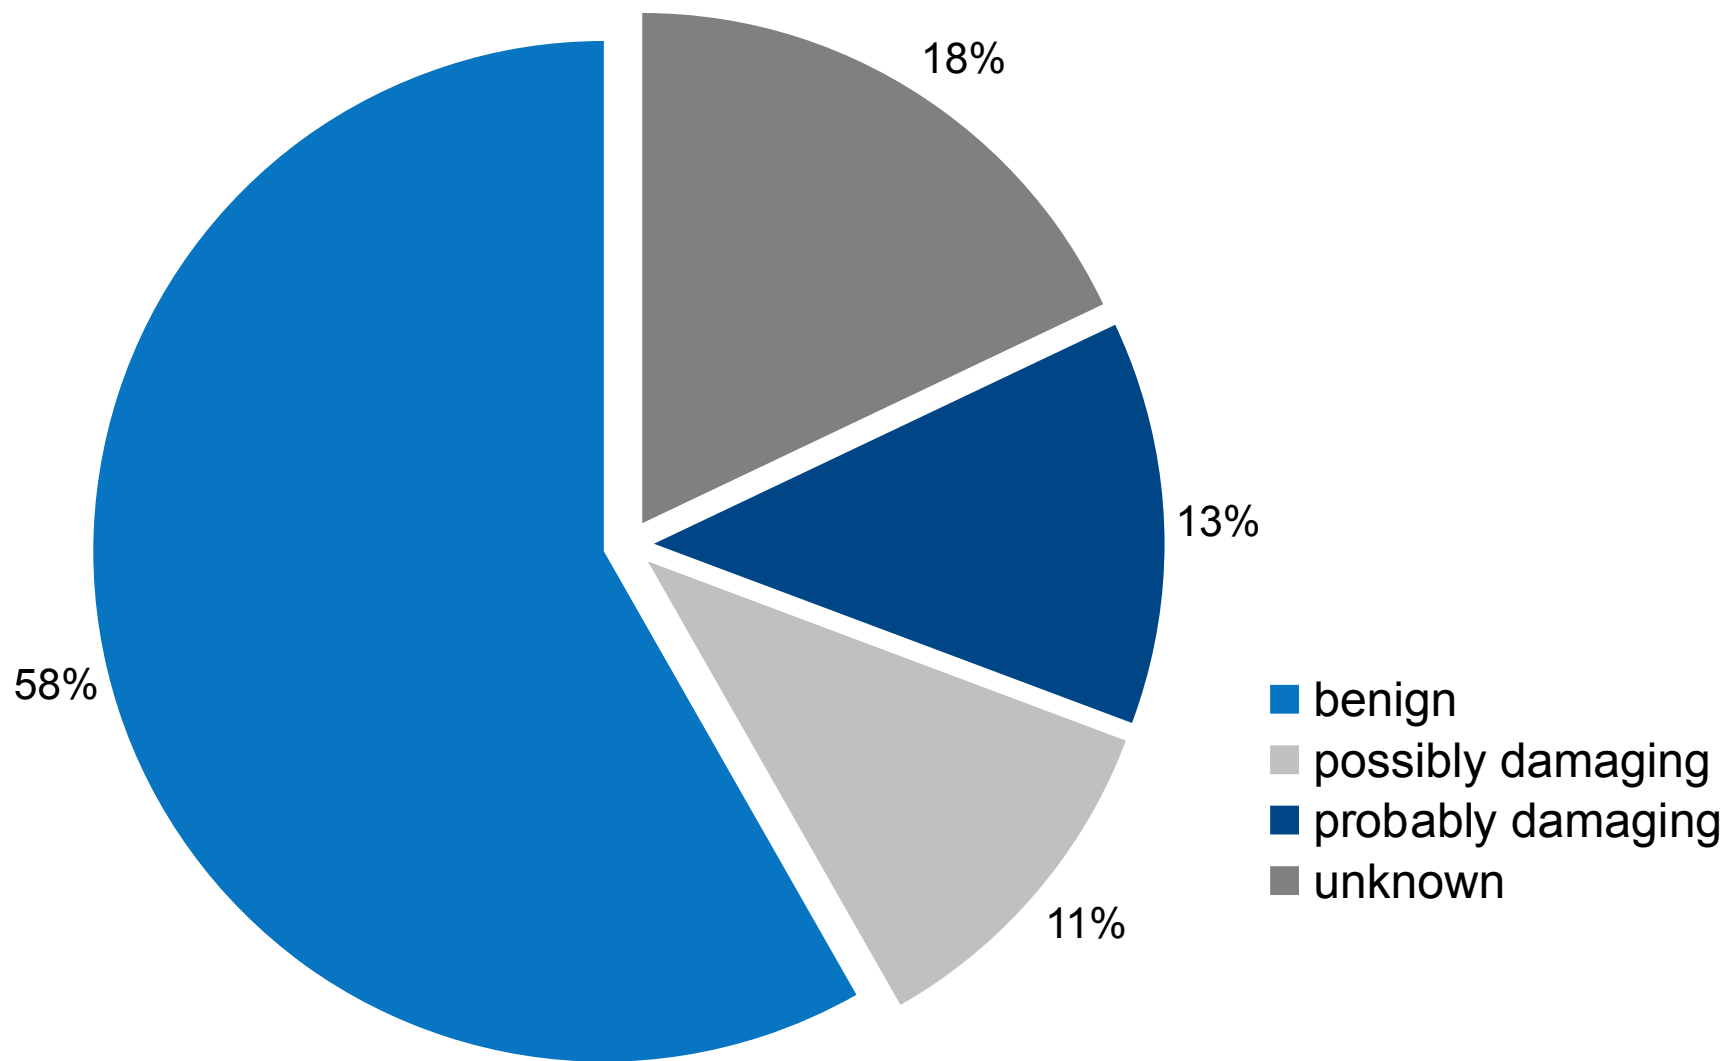

Supplement: 1471-2164-14-446-S5.pdf [file 1471-2164-14-446-S5.pdf]
