# Supplementary material for: Assessment of the genomic variation in a cattle population by re-sequencing of key animals at low to medium coverage
Source: PubMed Central journal article supplement (PMC3716689; doi:10.1186/1471-2164-14-446), 2013-07-04
Supplement: 1471-2164-14-446-S8.pdf [file 1471-2164-14-446-S8.pdf]

| <b>Id</b> | <b>36 bp</b> | <b>76 bp</b> | <b>96 bp</b> | <b>100 bp</b> | <b>101 bp</b> |
|-----------|--------------|--------------|--------------|---------------|---------------|
| 55069     | -            | -            | -            | -             | 100.00%       |
| 55070     | -            | -            | -            | 100.00%       | -             |
| 55071     | -            | -            | -            | 100.00%       | -             |
| 55072     | -            | -            | -            | 100.00%       | -             |
| 55073     | -            | -            | -            | -             | 100.00%       |
| 55074     | -            | -            | -            | -             | 100.00%       |
| 55075     | -            | -            | -            | 100.00%       | -             |
| 55076     | -            | -            | 22.37%       | 22.37%        | 55.26%        |
| 55077     | -            | -            | 16.5%        | 16.5%         | 67.00%        |
| 55078     | -            | -            | 17.97%       | 17.98%        | 64.05%        |
| 55687     | -            | -            | -            | -             | 100.00%       |
| 55689     | -            | -            | 15.69%       | 84.31%        | -             |
| 55690     | -            | -            | 49.99%       | 50.01%        | -             |
| 55691     | -            | -            | -            | 100.00%       | -             |
| 55692     | -            | -            | -            | 100.00%       | -             |
| 55693     | -            | -            | -            | 100.00%       | -             |
| 55694     | -            | -            | -            | 100.00%       | -             |
| 55695     | -            | -            | -            | 36.54%        | 63.46%        |
| 55696     | -            | -            | -            | 37.3%         | 62.7%         |
| 55697     | -            | -            | -            | 100.00%       | -             |
| 55698     | -            | -            | -            | 100.00%       | -             |
| 56503     | -            | -            | -            | 100.00%       | -             |
| 56504     | -            | -            | -            | 100.00%       | -             |
| 56505     | -            | -            | -            | 100.00%       | -             |
| 56506     | -            | -            | -            | 100.00%       | -             |
| 56507     | -            | -            | -            | 100.00%       | -             |
| 56508     | -            | -            | -            | 100.00%       | -             |
| 56509     | -            | -            | -            | 100.00%       | -             |
| 58941     | -            | -            | -            | -             | 100.00%       |
| 58943     | -            | -            | -            | 100.00%       | -             |
| 58944     | -            | -            | -            | 100.00%       | -             |
| 58945     | -            | -            | -            | 100.00%       | -             |
| 58946     | -            | -            | -            | 100.00%       | -             |
| 58947     | -            | -            | -            | 100.00%       | -             |
| 58948     | -            | -            | -            | 100.00%       | -             |
| 58949     | -            | -            | -            | -             | 100.00%       |
| 58950     | -            | -            | -            | 100.00%       | -             |
| 58951     | -            | -            | -            | -             | 100.00%       |
| 58952     | -            | -            | -            | 100.00%       | -             |
| 58953     | -            | -            | -            | 100.00%       | -             |
| esmeralda | -            | 69.75%       | -            | 30.25%        | -             |
| vanstein  | 100.00%      | -            | -            | -             | -             |
| valero    | -            | -            | -            | 100.00%       | -             |
